# Supplementary material
Source: PubMed Central journal article supplement (PMC8688582)
Supplement: NIHMS1699656-supplement-1.pdf [file NIHMS1699656-supplement-1.pdf]

## Supplemental Figure 1

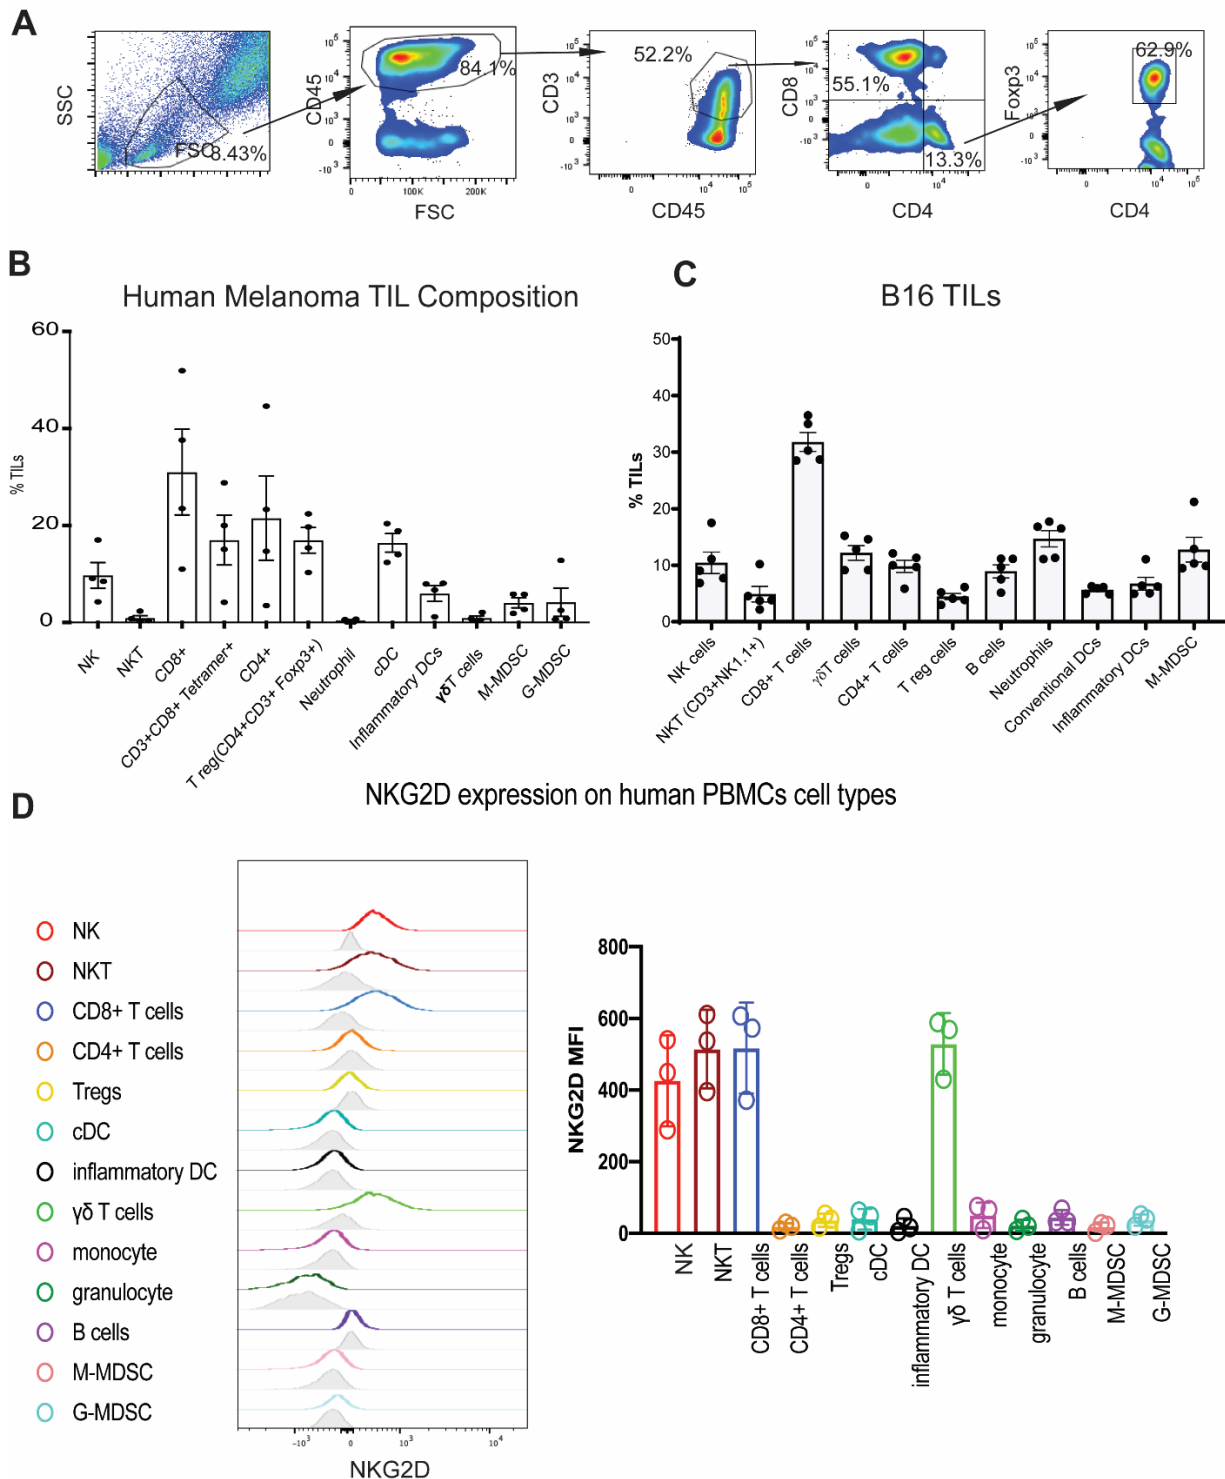

**Supplemental Figure 1:** (A) Representative example of gating strategy for TILs in B16<sup>ova</sup> melanoma. (B) Flow cytometric analysis of TILs from resected human melanoma specimens. (C) TIL composition of B16 melanoma. (D) Expression of NKG2D on various leukocyte subsets from human PBMCs.

## Supplemental Figure 2

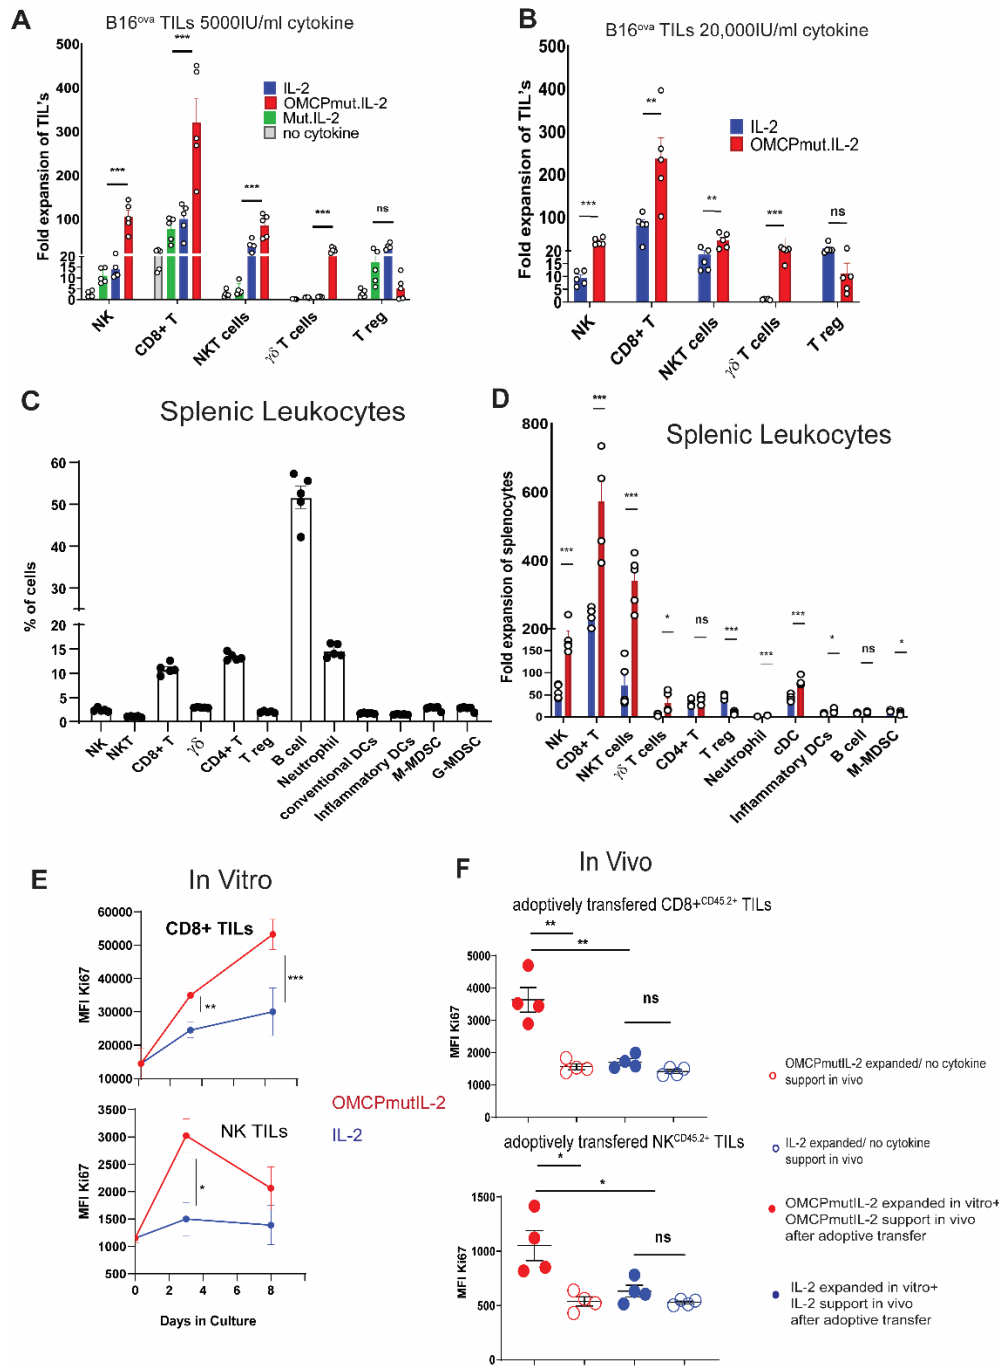

**Supplemental Figure 2:** (A) Expansion of TILs with OMCPmutIL-2, wild-type IL-2, mutIL-2, or no cytokine. Line indicates t-test comparison mutIL-2 vs OMCPmutIL-2. (B) Expansion of TILs in 20,000IU cytokine/ml. (C) Relative distribution of various leucocytes from a resting B6 spleen. (D) Relative expansion of splenic leucocytes expanded in OMCPmutIL-2 (red) or wild-type IL-2 (blue). (E) Mitosis of CD8<sup>+</sup> T cells and NK cells during *in vitro* TIL culture as measured by KI-67 MFI. (F) Mitosis of adoptively transferred CD8<sup>+</sup>CD45.2<sup>+</sup> and NK<sup>CD45.2+</sup> cells into B16<sup>ova</sup>-bearing B6<sup>CD45.1+</sup> congenic mice as measured by KI-67 expression levels. Transferred TILs evaluated in the tumor bed. \*\*\*=p<.001; \*\*=p<.01; \*=p<.05

### Supplemental Figure 3

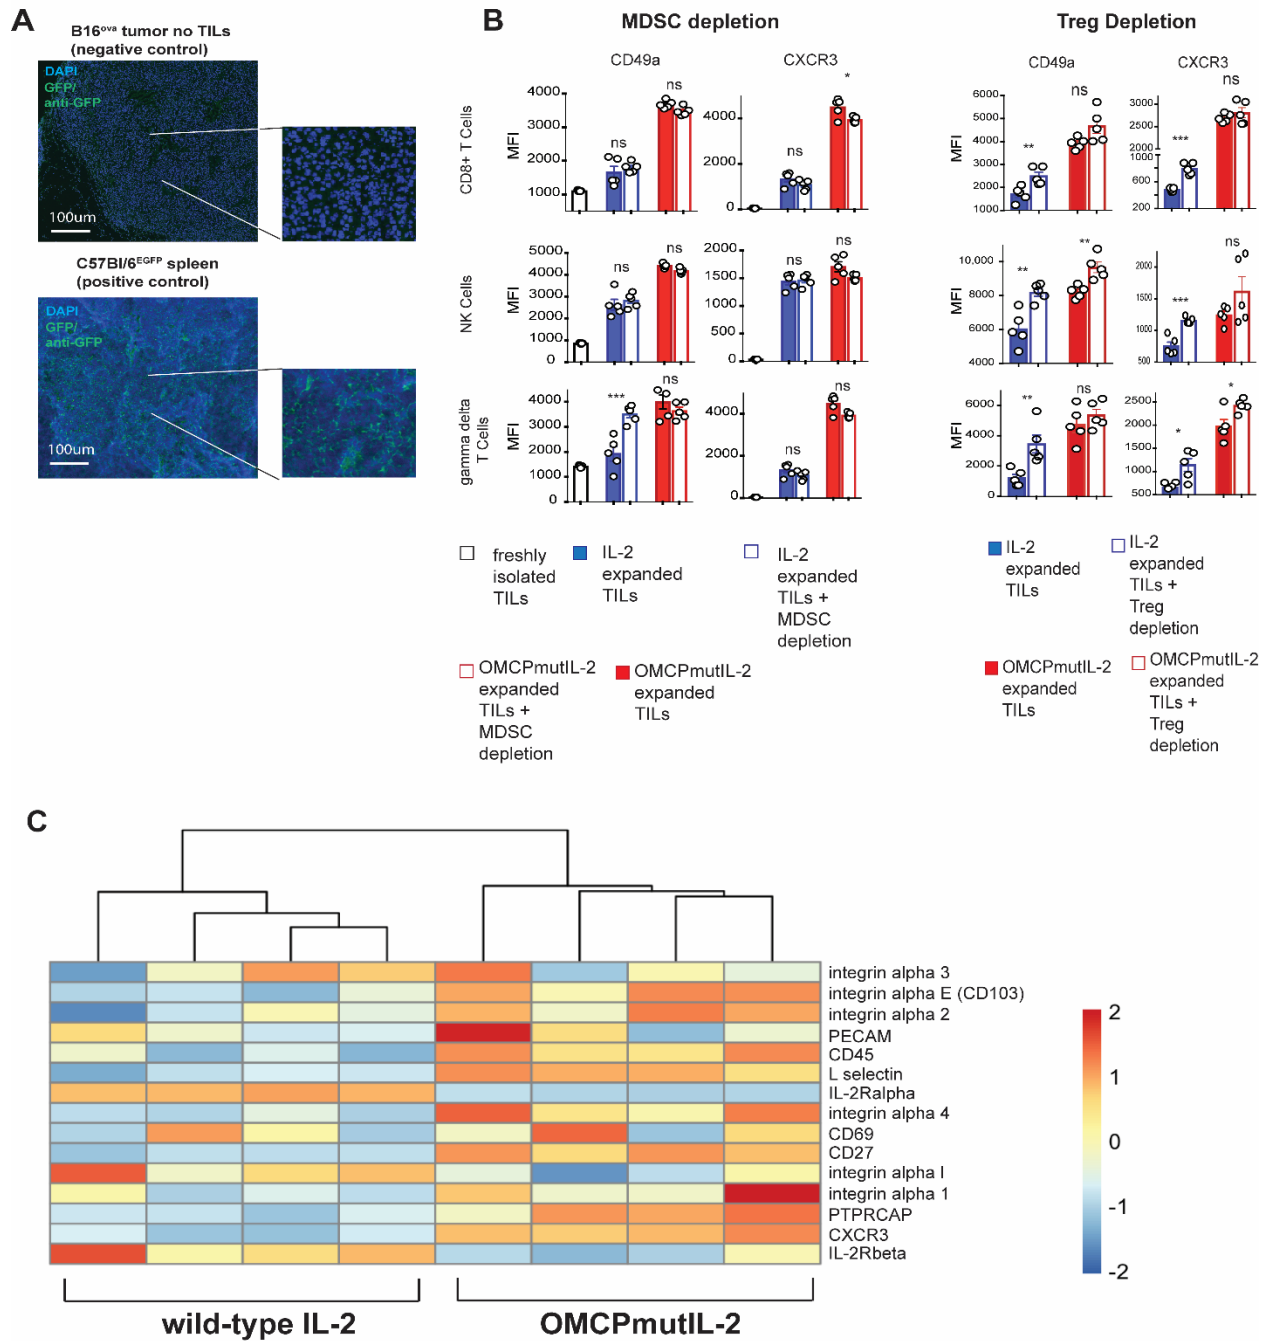

**Supplemental Figure 3:** (A) Immunohistochemical analysis of B16<sup>ova</sup> tumor that did not receive C57Bl/6<sup>EGFP</sup> TILs (negative imaging control) (top) and spleen of C57Bl/6<sup>EGFP</sup> mouse (positive imaging control)(bottom). Relative expression, by median fluorescence intensity (MFI), of CD49a or CXCR3 on TIL-resident CD8<sup>+</sup> T cells, NK cells or  $\gamma\delta$  T cells after either MDSC or Treg depletion prior to expansion in IL-2 (blue) or OMCPmutIL-2 (red). \* $p < .05$ ; \*\* $p < .01$ , \*\*\* $p < .001$ , NS  $p > .05$

## Supplemental Table

| <b>Supplemental Table: SPR Binding</b> |                                                                            |                                                          |                              |
|----------------------------------------|----------------------------------------------------------------------------|----------------------------------------------------------|------------------------------|
|                                        | <b><math>k_{on}</math> (<math>10^6 \text{ m}^{-1}\text{s}^{-1}</math>)</b> | <b><math>k_{off}</math> (<math>\text{s}^{-1}</math>)</b> | <b><math>K_D</math> (nM)</b> |
| mCD25:wild-type IL-2                   | $0.97 \pm 0.25$                                                            | $0.038 \pm 0.01$                                         | $42.7 \pm 11.8$              |
| mNKG2D:OMCPmutIL-2                     | $2.6 \pm 0.58$                                                             | $0.017 \pm 0.005$                                        | $7.3 \pm 1.8$                |
